1

2

3

4

5

6

7

8

9

10

11

12

13

14

15

16

**Common lizards break Dollo's law of irreversibility: genome-wide  
phylogenomics support a single origin of viviparity and re-evolution of oviparity**

Hans Recknagel<sup>a</sup>, Nick Kamenos<sup>b</sup>, Kathryn R. Elmer<sup>a\*</sup>

<sup>a</sup> Institute of Biodiversity, Animal Health & Comparative Medicine, College of Medical,  
Veterinary & Life Sciences, University of Glasgow, Glasgow, G12 8QQ UK

<sup>b</sup> School of Geographical and Earth Sciences, University of Glasgow, Glasgow G12 8QQ,  
UK

\*Corresponding author, e-mail: [Kathryn.Elmer@glasgow.ac.uk](mailto:Kathryn.Elmer@glasgow.ac.uk)

17 **Key Words:** Squamata; Lacertidae; Dollo's law; viviparity; biogeography; molecular  
18 systematics.

19

20

21

22 **Abstract**

23 Dollo's law of irreversibility states that once a complex trait has been lost in  
24 evolution, it cannot be regained. It is thought that complex epistatic interactions and  
25 developmental constraints impede the re-emergence of such a trait. Oviparous  
26 reproduction (egg-laying) requires the formation of an eggshell and represents an  
27 example of such a complex trait. In reptiles, viviparity (live-bearing) has evolved  
28 repeatedly but it is highly disputed if oviparity has re-evolved. Here, using up to  
29 194,358 SNP loci and 1,334,760 bp of sequence, we reconstruct the phylogeny of  
30 viviparous and oviparous lineages of common lizards and infer the evolutionary  
31 history of parity modes. Our phylogeny strongly supports six main common lizard  
32 lineages that have been previously identified. We find very high statistical support for  
33 a topological arrangement that suggests a reversal to oviparity from viviparity. Our  
34 topology is consistent with highly differentiated chromosomal configurations between  
35 lineages, but disagrees with previous phylogenetic studies in some nodes. While we  
36 find high support for a reversal to oviparity, more genomic and developmental data  
37 are needed to robustly test this and assess the mechanism by which a reversal might  
38 have occurred.

39

## 40 **1. Introduction**

41           There are numerous examples for the loss of a complex trait in the animal  
42 kingdom throughout evolution. Dollo's law of irreversibility states that once such a  
43 complex trait has been lost, it cannot be regained (Dollo, 1893). Some exceptions to  
44 this rule have been discovered, though it remains a very rare phenomenon in evolution  
45 (Collin and Miglietta, 2008; Lynch and Wagner, 2010). Oviparity (egg-laying) is an  
46 example for such a complex trait and has been lost on several independent occasions  
47 throughout animal evolution (Lee and Shine, 1998; Murphy and Thompson, 2011).  
48 While there are more than a hundred independent transitions from oviparity to  
49 viviparity (live-bearing) in reptiles (Blackburn, 2006; Sites et al., 2011), only one  
50 robust example for the re-evolution of the eggshell is known to date (Lynch and  
51 Wagner 2010). Molecular mechanisms by which reversals in complex traits such as  
52 reproductive mode occur are to date unknown.

53           The common lizard (*Zootoca vivipara*) is the most widespread extant  
54 terrestrial reptile species. Its distribution covers nearly the whole of Europe, northern  
55 and central Asia and as far as Japan in its easternmost range. Within this distribution,  
56 common lizards have adapted to various extreme environments. Arguably the most  
57 salient of these adaptations is the evolution of viviparous, unique within the family of  
58 'true' (lacertid) lizards that are otherwise oviparous. As one of the youngest  
59 transitions from oviparity (egg-laying) to viviparity (live-bearing) known in  
60 vertebrates (Pyron and Burbrink, 2014; Surget-Groba et al., 2006), common lizards  
61 are an emerging model system for the study of viviparity (Freire et al., 2003; Le  
62 Galliard et al., 2003; Murphy and Thompson, 2011). However, not all common  
63 lizards are live-bearing: of the six currently recognized common lizard lineages, two  
64 are oviparous and four are viviparous (Surget-Groba et al., 2006; Fig. 1). One  
65 oviparous lineage is restricted to northern Spain and southwestern France, allopatric  
66 to all other common lizard lineages. A second oviparous lineage occurs in the  
67 southern part of the Alps. Four viviparous lineages cover the rest of the Eurasian  
68 distribution (Mayer et al., 2000; Surget-Groba et al., 2006; Fig. 2).

69           The phylogenetic relationships within *Zootoca* have not been fully resolved.  
70 The evolutionary history of the two different parity modes has been controversial  
71 depending on which data was used to interpret the phylogenetic relationships. In a

72 first study using a single mitochondrial gene, both oviparous lineages were found to  
73 be basal to all other viviparous lineages, consistent with a single origin of viviparity  
74 (Surget-Groba et al., 2001; Fig. 1A). However, subsequent analyses on the karyotype  
75 of common lizards resulted in a more complex evolutionary scenario, arguing for two  
76 origins of viviparity based on sex-chromosome evolution ( $Z_1Z_2W$  or  $ZW$ ) (Odierna et  
77 al., 2004; Surget-Groba et al., 2006; Fig. 1B). More extensive geographic sampling  
78 and sequencing of mitochondrial genes instead favored a scenario of a single origin of  
79 viviparity followed by a reversal to oviparity in the Spanish Western Oviparous  
80 lineage (Cornetti et al., 2014; Surget-Groba et al., 2006; Fig. 1C), though this  
81 phylogeny was incompatible with a single origin of the  $Z_1Z_2W$  sex chromosome  
82 system. Finally, a population inhabiting the Carpathian region in Romania was  
83 discovered recently and was found to be most closely related to the phylogenetically  
84 basal Eastern Oviparous lineage based on mtDNA (Velekei et al., 2015; Fig. 1D). The  
85 reproductive mode of this lineage was not reported, but since all other common lizard  
86 populations in its geographic proximity are viviparous (Surget-Groba et al., 2006), this  
87 would suggest another independent origin of viviparity. However, all phylogenies to  
88 date have had limited support at basal nodes essential for the interpreting the  
89 evolutionary scenarios of parity mode evolution. Moreover, phylogenies reconstructed  
90 only from mitochondrial DNA have limited information and frequently misrepresent  
91 the ‘true’ phylogenetic relationships (Ballard and Whitlock, 2004; Near and Keck,  
92 2013; Wallis et al., 2017). Therefore, it is essential to incorporate high resolution  
93 nuclear DNA sequencing to resolve difficult topologies. Moreover, coalescent-based  
94 approaches for disentangling incomplete lineage sorting effects and hybridization  
95 have considerably advanced phylogenetic reconstruction (Bouckaert et al., 2014;  
96 Pickrell and Pritchard, 2012; Posada, 2016).

97         The evolutionary implications for models involving several origins of  
98 viviparity and/or a reversal to oviparity are significant. A reversal to oviparity from  
99 viviparity is considered a very unlikely evolutionary scenario, presumably breaking  
100 Dollo’s law of irreversibility. Common lizard parity mode evolution could represent  
101 one of the very few examples for an exception to this rule (Surget-Groba et al., 2006).  
102 Further, the evolution of both oviparity and viviparity are difficult to study from a  
103 molecular genetic perspective because they have most frequently occurred at deep

104 evolutionary time scales. Common lizards provide an example of recent parity mode  
105 changes and therefore a critical insight to usually more ancient evolutionary events.

106 To tackle this outstanding phylogenetic question, we use genome-wide  
107 phylogenomics with data from double-digest restriction-site associated DNA  
108 sequencing (ddRADSeq), a next generation sequencing (NGS) technique, to identify  
109 DNA polymorphisms across all common lizard lineages (Peterson et al., 2012;  
110 Recknagel et al., 2015, 2013). Using broad geographic sampling of 70 individuals, we  
111 reconstructed a nuclear phylogeny of 194,358 bp, and a mtDNA phylogeny based on  
112 cytochrome b, using coalescent, Maximum Likelihood, and Maximum Parsimony  
113 methods. We performed topological tests to assess likelihoods of alternative  
114 evolutionary scenarios for parity mode evolution based on our phylogenomic dataset,  
115 which consistently supported an evolutionary scenario. Our results strongly support a  
116 single origin of viviparity in common lizards and a subsequent reversal to oviparity in  
117 one derived lineage as the most parsimonious scenario of reproductive mode  
118 evolution.

## 119 **2. Material and Methods**

120

### 121 *2.1 Sampling*

122 Samples and specimens were obtained from the Natural History Museum in  
123 Vienna, the Royal Ontario Museum, and fieldwork during 2013-2016 (see Table S1  
124 for specimens and Fig. 2 for a map of collecting localities). Lizards were collected by  
125 diurnal opportunistic searches. Tail clips (up to 2 cm) were extracted and preserved in  
126 95-99% ethanol and lizards were released thereafter. Mode of reproduction was  
127 assessed by observation of an individual retained in captivity until  
128 oviposition/parturition or from data on other individuals at the same site.

129

### 130 *2.2 Generation of molecular data*

131 DNA was extracted from tissue using a Dneasy Blood and Tissue Kit (Qiagen)  
132 following the manufacturer's protocol. Three genomic libraries were constructed  
133 using double-digest restriction-site associated DNA sequencing (ddRADSeq). The  
134 first two libraries were run on an IonProton sequencing machine with a median of 96  
135 bp read length (ddRADSeq-ion; Recknagel et al., 2015) and the third library was  
136 paired-end sequenced on an Illumina HiSeq 4000 with 150 bp read length. Briefly, 1  
137 µg of starting DNA material was digested using restriction enzymes *PstI*-HF and *MspI*  
138 and subsequently cleaned with the Enzyme Reaction Cleanup kit (Qiagen). Following  
139 purification, the amount of DNA in each individual was normalized to the sample  
140 with the lowest concentration within a library (237 ng in first, 400 ng in second, and  
141 275 ng in third library) to minimize coverage variation. Platform specific barcoded  
142 (for IonProton: A-adapter, for Illumina: P1 adapter; binding to *PstI*-HF overhang) and  
143 global (for IonProton: P1-adapter, for Illumina: P2 adapter; binding to *MspI*  
144 overhang) adapters were ligated to the sticky ends generated by restriction enzymes.  
145 The ligated DNA fragments were then multiplexed and size-selected using a Pippin  
146 Prep (Sage Science) for a range between 175 - 225 bp for the IonProton platform and  
147 150 - 210 bp for Illumina. To assure that the same set of loci are selected between  
148 platforms, size selection ranges were adjusted because adapter lengths are not the  
149 same between platforms. Seven separate PCR reactions (for details see Recknagel et  
150 al., 2015) were performed per genomic library and combined (Peterson et al., 2012).

151 Following PCR purification, libraries were electrophoresed on a 1.25% agarose gel to  
152 remove any remaining adapter dimers and fragments outside the size range selected  
153 by the Pippin Prep. SYBR Safe (Life Technologies) was used for gel staining and  
154 bands in the size selected range were cut out manually and DNA was extracted from  
155 the matrix using a MinElute Gel Extraction Kit (Qiagen). Following the gel  
156 extraction, DNA was quantified using a Qubit Fluorometer with the dsDNA BR  
157 Assay. Quality and quantity of genomic libraries was assessed using a TapeStation or  
158 Bioanalyzer (Agilent Technologies). The first two libraries were sequenced at  
159 Glasgow Polyomics using an Ion PI Sequencing 200 Kit v3 on an Ion Proton PI chip  
160 at a target read size of 100 bp. The third library was sequenced at Edinburgh  
161 Genomics on an Illumina HiSeq 4000 machine with paired-end sequencing of 150 bp  
162 reads.

163 In addition to ddRADseq, mitochondrial DNA (mtDNA) from cytochrome b  
164 with primers MVZ04H and MVZ05L (~430 bp) was amplified (Smith and Patton,  
165 1991) and PCR products were sequenced with the forward primer (MVZ04H) on an  
166 ABI 3130x at Dundee University. Sequences were quality checked by eye, and  
167 trimmed and aligned using Geneious v. 7.1.9 (Kearse et al., 2012). Data are deposited  
168 in NCBI (Genbank accession with manuscript acceptance).

169

### 170 *2.3 Bioinformatic analysis*

171 All NGS generated reads were analyzed using the RADseq software tool  
172 STACKS v.1.41 (Catchen et al., 2011). Reads were trimmed to a common length of  
173 70 bp to maximize the number and length of retained reads (Recknagel et al., 2015).  
174 Libraries were de-multiplexed and all reads were sorted into stacks of loci within each  
175 individual (maximum distance of 2 bp within a locus). The minimum coverage  
176 threshold per individual locus was set to five. Each individual was then aligned to a  
177 *Zootoca vivipara* reference genome v. 0.9 (Yurchenko et al. in prep) using bwa (Li  
178 and Durbin, 2010) and samtools (Li et al., 2009). A catalogue of all loci identified  
179 across individuals was subsequently created using the genome referenced stacks from  
180 each individual.

181 Missing data can have a substantial impact on phylogenetic inference from  
182 NGS generated data and can vary between taxonomic and phylogenetic levels (Eaton

183 et al., 2017; Jiang et al., 2014; Rowe et al., 2011; Streicher et al., 2016). Therefore, it  
184 is crucial to first evaluate the impact of missing data before phylogenetic analysis. We  
185 filtered our data with two main options: i) using a variable minimum number of  
186 individuals that a locus had to be present in, and ii) varying the number of SNPs per  
187 locus from one to three. The amount of missing data was increased from 0% to 90%  
188 at 10% intervals. For each of these categories, loci containing only a single SNP, two  
189 SNPs, three SNPs and one to three SNPs were extracted from the whole dataset.  
190 These datasets were extracted to test the impact of missing data and number of SNPs  
191 on phylogenetic resolution and to assess optimal settings for data extraction.

192

#### 193 *2.4 Phylogenetic analysis*

194 Suitability of data sets that differed in degree of missing data and number and  
195 type of SNP loci was assessed by comparing the sum of bootstrap supports (at deep, at  
196 shallow, and at all nodes combined) (Huang and Lacey Knowles, 2016). The best  
197 performing dataset for inferring the evolutionary history of parity mode in common  
198 lizards was identified and chosen for more exhaustive phylogenetic and comparative  
199 analyses. This best performing dataset was assessed by constructing Maximum-  
200 likelihood (ML) phylogenies using the software RAxML vers. 8.1.20 with a  
201 GTRGAMMA substitution model of evolution (Stamatakis, 2006). Conditions  
202 producing the highest bootstrap sum phylogeny were the ones chosen for all  
203 subsequent analyses.

204 We inferred Maximum-likelihood (ML) phylogenies using RAxML. An initial  
205 phylogenetic analysis including the outgroup species *Iberolacerta horvathi* identified  
206 the Eastern Oviparous clade as basal to all five other *Zootoca* lineages with high  
207 confidence (bootstrap support 100), as has been shown by previous analyses (Cornetti  
208 et al., 2014; Mayer et al., 2000; Surget-Groba et al., 2006). We further used  
209 ADMIXTURE (vers. 1.3.0; Alexander et al., 2009) to test for monophyly of the main  
210 *Zootoca* lineages. ADMIXTURE assesses the genomic ancestry of individuals  
211 according to a given set of genetic clusters. A variable number of genetic clusters  $k$   
212 was run, from 1 to 6  $k$  and best fit inferred from ten-fold cross-validation. The genetic  
213 cluster with the lowest cross-validation error was chosen as optimal  $k$ . These analyses  
214 confirmed monophyly of the six main lineages and limited levels of admixture.



215 Pairwise genetic differentiation between lineages was assessed using the R package  
216 *diveRsity* (Keenan et al., 2013).

217 A Maximum likelihood bootstrap search with 100 replicates using a  
218 GTRGAMMA model was performed in RAxML. Support values were drawn on the  
219 best scoring ML tree. The best ML tree was compared to four alternative pre-defined  
220 topologies, which had been proposed in previous studies. These topologies included i)  
221 both oviparous lineages basal to all viviparous lineages (Mayer et al., 2000; Surget-  
222 Groba et al., 2001; Fig. 1A) ii) Eastern oviparous lineage basal + Central viviparous II  
223 basal to all remaining viviparous and oviparous (Odierna et al., 2004; Surget-Groba et  
224 al., 2006; Fig 1C), iii) Eastern oviparous lineage basal + Central viviparous I basal to  
225 all remaining viviparous and oviparous lineages, and iv) Romanian lineage sister to  
226 Eastern oviparous and basal to all other lineages (Velekei et al., 2015). We computed  
227 per site log likelihoods for each of the five trees and used these to perform  
228 Approximately Unbiased tests (AU tests) (Shimodaira, 2002), Shimodaira-Hasegawa  
229 tests (SH tests) (Shimodaira and Hasegawa, 1999), Kishino-Hasegawa tests (KH  
230 tests), and Bayesian posterior probabilities (PPs) calculated by the BIC approximation  
231 as all implemented in CONSEL vs. 0.1a (Shimodaira and Hasegawa, 2001).

232 We performed a coalescent-based Bayesian approach to infer the topology in  
233 BEAST2 (Bouckaert et al., 2014). For this approach, we included a full alignment of  
234 all RAD loci (19,068 RAD loci; 1,334,760 total bp; 84,017 variant sites). The number  
235 of total SNPs differs from other analyses as loci were set to be present in at least 40%  
236 of individuals of each of the six lineages, instead of just being present in at least 40%  
237 of individuals across the whole phylogeny. We used the GTRGAMMA substitution  
238 model. The analysis was run on CIPRES (Miller et al., 2010) for 500 million  
239 generations sampling trees every 50,000 and discarded 10% as burn-in. Convergence  
240 was assessed in TRACER (Rambaut and Drummond, 2009) and accepted if ESS  
241 values of all parameters were larger than 100.

242 Additional phylogenetic analyses were carried out under the Maximum  
243 Parsimony (MP) optimality criteria. We performed a heuristic bootstrap search with  
244 2000 replicates carried out in PAUP\* (Swofford, 2002) using TBR branch swapping  
245 and with ten random addition sequence replicates for each bootstrap replicate. The

246 50% consensus bootstrap tree was compared to phylogenies generated with ML and  
247 Bayesian analyses.

248 To incorporate potential past migration events and incomplete lineage sorting  
249 effects, we performed a TREEMIX v.1.3 (Pickrell and Pritchard, 2012) search using  
250 only independent SNPs (one SNP per locus; 49,107 loci included) and a window size  
251 of 1000 bp. We included zero to six migration events and compared the variance  
252 explained between resulting tree with and without migration events to evaluate the  
253 impact of migration. We calculated  $f_3$ -statistics to assess whether admixture has  
254 played a role in the evolution of common lizard lineages.

255 For the mitochondrial dataset, we performed a bootstrap ML search using  
256 RAxML (100 bootstrap replicates), MP using the same parameters mentioned above  
257 and Bayesian reconstruction with BEAST2 to generate the phylogeny. The best  
258 substitution model for BEAST2 was inferred from eleven different substitution  
259 schemes in JMODELTEST2 (Darriba et al., 2012) based on lowest AICc and run on  
260 CIPRES. We ran BEAST2 for 20 million generations and discarded 10% as burn-in.  
261 Convergence was inferred if ESS values in TRACER were larger than 100.

## 262 **3. Results**

263

### 264 *3.1 Data evaluation and identification of optimal parameters for phylogenomic* 265 *dataset*

266 Total number of generated reads was 828,000,972 (1<sup>st</sup> library: 10,000,000  
267 reads, 2<sup>nd</sup> library: 42,377,658 reads, 3<sup>rd</sup> library: 775,623,314 paired-end reads). After  
268 sorting reads into individual loci, mean coverage per individual was 27.6x with a  
269 standard deviation of 11.0x (range: 9.2x – 66.9x; median: 24.1x).

270 We found that phylogenetic resolution generally improved by accepting larger  
271 amounts of individuals with missing data (Fig. S1). The best summed bootstrap  
272 support was achieved using loci that were present in at least 40% of all individuals.  
273 Accepting more missing data this did not improve phylogenetic resolution. The  
274 highest number of SNPs (including up to three SNPs) resulted in the overall highest  
275 phylogenetic resolution (Fig. S1). Therefore, we chose the dataset with loci present in  
276 at least 40% of all individuals and including all SNPs (no restriction on number of  
277 SNPs per locus) for all subsequent analyses. Genotyping error was low (2.0-2.9% per  
278 SNP) based on three technical replicates and comparable to previous studies  
279 (Mastretta-Yanes et al., 2015; Recknagel et al., 2015).

280

### 281 *3.2 Mitochondrial DNA phylogeny*

282 The final alignment of the cytochrome b gene consisted of 428 bp (42  
283 parsimony informative sites). HKY+I was identified as the best substitution model for  
284 BEAST2 (Table S2). This phylogeny resolved eastern oviparous, central viviparous,  
285 and western oviparous each as monophyletic (Fig. S2). However eastern viviparous,  
286 central viviparous, and western viviparous lineages were all polyphyletic, suggesting  
287 considerable introgression and a poor association of single gene mtDNA with the  
288 phylogeny generated from genome-wide data. Support values were generally  
289 considerably lower for both basal and terminal nodes compared to the phylogeny  
290 generated from the extensive genomic dataset. The topology also differed  
291 considerably from the topology generated from phylogenomic data (Fig. 3; Fig. S2).

292

293 *3.3 Monophyletic clades in Zootoca vivipara and reconstruction of evolutionary*  
294 *history*

295 All phylogenomic reconstructions confirmed six monophyletic evolutionary  
296 divergent lineages with high confidence (all MP and ML bootstrap supports of 100  
297 and PP of 1.0; Fig. 3). The eastern oviparous lineage is basal sister to all other  
298 lineages, followed by central viviparous II. The remaining four lineages are split into  
299 two groups, one with the western oviparous and central viviparous I lineages as sister  
300 and one with the eastern and western viviparous lineages. This topology is concordant  
301 with a single origin of viviparity and a reversal to oviparity in the western oviparous  
302 lineage (see 3.2 for topological analyses). Population structure also confirmed these  
303 six genetic lineages, with high average membership values for each respective lineage  
304 (mean Q-values ranged from 92-100% identity within each lineages) (Fig. 3). These  
305 six lineages correspond to phylogeographic clades that were previously identified.  
306 The recently reported distinct Carpathian haploclade (Velekei et al., 2015) was not  
307 confirmed as a separate genetic cluster in our phylogenomic reconstruction and was  
308 nested within the Eastern viviparous lineage (individuals ELT07086-ELT07095). Our  
309 mitochondrial dataset confirmed monophyly of some of the lineages with good  
310 support (eastern oviparous, central viviparous, western oviparous), while others were  
311 not supported (Fig. S2). In contrast to the nuclear data, the separate Carpathian clade  
312 was strongly confirmed by mitochondrial DNA and monophyletic, sister to the eastern  
313 oviparous lineage (Fig. S2).

314 Genetic differentiation between all six lineages was substantial (Table S3). *Fst*  
315 and *Jost D's* values were largest between eastern oviparous and all other lineages  
316 (*Fst*: 0.42 – 0.52; *Jost D*: 0.013 – 0.018), and second largest between western  
317 oviparous and all other lineages (*Fst*: 0.35 – 0.51; *Jost D*: 0.007 – 0.016), indicating  
318 that these are the most highly differentiated lineages. Compared to *Fst*, *Jost D* was  
319 weaker between the western oviparous and all other viviparous lineages (Table S3).  
320 Genetic differentiation between the viviparous lineages was less pronounced (*Fst*:  
321 0.23 – 0.32; *Jost D*: 0.004 – 0.008).

322

323 *3.4 Evolutionary scenarios for parity evolution*

324 We found significant support for topologies associated with a single origin of  
325 viviparity and a reversal to oviparity. Bayesian, Maximum likelihood and parsimony  
326 analyses all confirmed the same topological configuration for the six main common  
327 lizard lineages with high nodal supports (bootstraps > 100, all posterior probabilities =  
328 1.0) (Fig. 3). Phylogenies from all reconstruction methods support a topology in  
329 which the eastern oviparous lineage is basal to all other lineages. The following  
330 lineage splitting off is the central viviparous II lineage, sister to all remaining  
331 lineages. The western oviparous lineage is nested within the viviparous lineages,  
332 sister to the central viviparous I lineage. This topology suggests a single origin of  
333 viviparity in common lizards and a reversal to oviparity in the western oviparous  
334 lineage as the most parsimonious scenario for parity mode evolution.

335 Using monophyly constraints and statistical topology testing, any topologies  
336 compatible with alternative scenarios of parity mode evolution. Alternative scenarios  
337 included: oviparity as a basal trait and a single origin of viviparity (Figure 1A; Table  
338 1), multiple independent origins of viviparity (Figure 1B; Table 1), a reversal to  
339 oviparity but independent sex chromosome evolution (Figure 1C; Table 1), and  
340 multiple origins of viviparity and a reversal to oviparity (Figure 1D; Table 1) and  
341 were all significantly less likely (Table 1) than a single origin of evolution, a reversal  
342 to oviparity and a single change in sex chromosome configuration, consistent with  
343 Figure 3.

344 Reconstructing evolutionary relationships between the six main phylogenetic  
345 lineages in TREEMIX results in a similar topology as retrieved from the other  
346 analyses, with eastern oviparous consistently sister to all other lineages. Overall  
347 likelihood and variance explained increased including more migration events, and  
348 reached a plateau after two migration events (Fig. S3). Topologies were unstable  
349 when more migration events were included, though these topological changes should  
350 be considered with caution since all  $f_3$ -statistics were positive, indicating that  
351 admixture has not played a major role in the evolution of common lizard lineages  
352 (Table S4).

353

## 354 **4. Discussion**

355

### 356 *4.1 Evolutionary history of parity mode evolution*

357 Here, we show that the most parsimonious scenario for the evolution of parity  
358 mode evolution in common lizards includes a single origin of viviparity and a reversal  
359 to oviparity in a single lineage (western oviparous). Our genome-level phylogeny  
360 based on up to 194,358 nucleotides was highly supported by Bayesian ML, and MP  
361 analyses (support values >0.95). Topologies compatible with other parity mode  
362 scenarios, such as a no reversal to oviparity or multiple origins of viviparity (per Fig  
363 1A, B, D) performed significantly worse in all statistical tests (Table 1). We find  
364 considerable differences between our high resolution phylogenomic tree and our  
365 mtDNA phylogeny.

366 The evolution of oviparity and viviparity in common lizards has been  
367 contentious and a range of studies, using different geographic and genetic sampling,  
368 have failed to converge on an evolutionary scenario. To date, mitochondrial DNA,  
369 nuclear DNA, and karyotypic markers have not agreed on a single topology (Fig. 1;  
370 Odierna et al., 2004; Surget-Groba et al., 2006, 2001; Velekei et al., 2015). For  
371 example, previous research suggested that a reversal to oviparity occurred in common  
372 lizards, however support was based on only limited data and support (Cornetti et al.,  
373 2014; Surget-Groba et al., 2006). It has also been proposed that viviparity evolved  
374 multiple times independently (Odierna et al., 2004; Velekei et al., 2015), however,  
375 these studies were limited to the use of a single marker. Our phylogeny is the first that  
376 is consistent with nuclear genetic markers and chromosomal configuration (Fig. 1;  
377 Fig. 3).

378 In addition to our robust and well supported phylogeny and the topological  
379 statistics, other aspects of common lizard genetics and reproductive traits also support  
380 our inference of a reversal to oviparity. The eastern oviparous and western oviparous  
381 lineages have different morphological and physiological egg characteristics, such as  
382 thinner eggshells and shorter incubation time (Arrayago et al., 1996; Lindtke et al.,  
383 2010). We suggest this is compatible with our phylogeny; the derived oviparous  
384 lineage is due to a reversal to oviparity instead of retaining the ancestral oviparous  
385 condition, and in doing so the thickness of the eggshell is reduced. Our phylogeny is

386 consistent with the most parsimonious scenario for the derived chromosomal features  
387 in common lizards: While both the eastern oviparous and central viviparous II  
388 lineages have 36 chromosomes and a ZW sex chromosome configuration, all other  
389 lineages exhibit 35 chromosomes and a  $Z_1Z_2W$  sex chromosome configuration  
390 (Kupriyanova et al., 2008; Odierna et al., 2004; Fig. 1). Previous genetic studies were  
391 inconsistent with this derived sex chromosome configuration by placing central  
392 viviparous II nested within lineages exhibiting the  $Z_1Z_2W$  chromosome configuration  
393 instead of being basal to lineages with the derived configuration (Cornetti et al., 2014;  
394 Surget-Groba et al., 2001, 2006). The phylogeny presented here is the first molecular  
395 phylogeny consistent with a single transition in sex chromosome configuration,  
396 changing from the ancestral ZW system to the derived  $Z_1Z_2W$  system (Kupriyanova et  
397 al., 2006; Odierna et al., 2004).

398       Calcified eggshell and the associated reproductive life history traits of  
399 oviparity represent a complex character that once lost is unlikely to re-evolve, making  
400 it a trait long regarded to be subjected to Dollo's law of irreversibility (Lee and Shine,  
401 1998; Shine and Lee, 1999; Sites et al., 2011). However, research on the re-evolution  
402 of insect wings (Collin and Miglietta, 2008; Whiting et al., 2003), snail coiling (Collin  
403 and Cipriani, 2003), or mandibular teeth in frogs (Wiens, 2011) has shown that in  
404 some cases complex characters can indeed re-evolve. In squamate reptiles, one  
405 example exists arguing for the re-evolution of oviparity in sand boas (Lynch and  
406 Wagner, 2010). In this example, a scenario with no reversal to oviparity required three  
407 additional evolutionary transitions compared to the most parsimonious scenario with a  
408 single reversal to oviparity. In addition to the support from parsimonious trait  
409 reconstruction from the phylogeny, sand boas lack the egg tooth, which is an  
410 important anatomical structure for hatching from eggs that is present in related  
411 oviparous snake species. This provides independent evidence for the derived state in  
412 sand boas and the re-evolution of oviparity (Lynch and Wagner, 2010). In general, in  
413 addition to support from phylogenetic reconstruction, it should be best practice to  
414 assess whether the trait re-evolved is developmentally and anatomically similar to the  
415 ancestral trait. Substantially different features of the trait in the derived compared to  
416 ancestral form can be considered additional evidence for re-evolution, rather than the  
417 less plausible scenario that the ancestral form was retained but changed over time

418 while an alternative trait was independently lost in multiple related lineages. In  
419 common lizards, the short timespan between the origin of viviparity and the re-  
420 evolution of oviparity might have facilitated the reversal, in that not many genomic  
421 changes were required. In general, a trait as complex as viviparity is thought to  
422 require several changes in the genome (Murphy and Thompson, 2011).

423 Whether reversals to oviparity from viviparity occurred frequently in  
424 squamate reptiles remains a highly controversial topic. Erroneous phylogenetic  
425 reconstruction and limited assessment of characteristics of the trait in question have  
426 led to the publication of controversial examples of re-evolution (e.g. Fairbairn et al.,  
427 1998; Pyron and Burbrink, 2014) that have been criticized heavily (Blackburn, 1999,  
428 2015; Griffith et al., 2015; King and Lee, 2015; Shine and Lee, 1999; Wright et al.,  
429 2015). Moreover, incomplete lineage sorting and/or introgression of the trait in  
430 question, combined with the limited molecular information included in most  
431 phylogenetic reconstructions, can lead to wrong conclusions in trait evolution (Hahn  
432 and Nakhleh, 2016). While here we found substantial support for the re-evolution of  
433 oviparity based on the largest genomic dataset to date, more knowledge on the  
434 development and genetics of the trait is necessary to unequivocally assess whether a  
435 reversal to oviparity occurred in common lizards. In the future, more refined  
436 phylogenetic reconstructions using whole genome and phylogenomic data combined  
437 with insights into the genetic mechanisms involved in parity mode evolution should  
438 provide answers on whether reversals to oviparity occur in squamates and how  
439 common they are.

440

#### 441 *4.2 Evolutionary relationships between common lizard lineages and comments on* 442 *taxonomic status*

443 Our genome-wide phylogeny recovered a new topology, but this included  
444 similar clades as previously supported by mitochondrial DNA reconstructions, except  
445 for the Carpathian clade, which we find is nested within the Eastern viviparous  
446 lineage (Fig. 1; Fig. 3; Fig. S3). Incongruence between nuclear data and mitochondrial  
447 data is observed frequently (Ballard and Whitlock, 2004; Near and Keck, 2013;  
448 Wallis et al., 2017). Consistent with previous phylogenetic analyses (Cornetti et al.,  
449 2014; Surget-Groba et al., 2006, 2001), we found the eastern oviparous lineage is



450 basal to all other common lizard lineages. Splitting order for the other lineages differs  
451 from previous phylogenetic reconstructions, however, the reciprocal monophyly of all  
452 remaining five lineages was highly supported by all analyses here. In agreement with  
453 this,  $f_3$ -statistics suggest that there was no significant admixture between lineages  
454 (Table S3). Past mitochondrial DNA introgression and capture are a possible  
455 mechanism explaining the discordance between mitochondrial and nuclear genes  
456 (Leavitt et al., 2017; Willis et al., 2014).

457         Based on the strong reciprocal monophyly of the lineages, we suggest that  
458 *Zootoca vivipara* should be divided into five or six subspecies. Some have argued that  
459 *Z. v. carniolica* should be recognized as a separate species based on limited gene flow  
460 and reproductive isolation (Cornetti et al., 2015a, 2015b). However, while  
461 hybridization is rare and might be geographically restricted, it does occur between *Z*  
462 *v. carniolica* and other viviparous common lizards (Lindtke et al., 2010; pers. obs.)  
463 and phenotypic differences are generally small (Guillaume et al., 2006; Rodriguez-  
464 Prieto et al., 2017). Given the old evolutionary split (Surget-Groba et al., 2006) and its  
465 distinctive reproductive biology species status might be warranted. All other main  
466 lineages (CVII, CVI, EV, WV, WO) could each be rendered a subspecific status given  
467 their clear evolutionary splits and differences in karyotype (Guillaume et al., 2006;  
468 Kupriyanova et al., 2006; Odierna et al., 2004, 1998; Surget-Groba et al., 2006).  
469 Currently, only *Z. v. louisiantzi* (WO) can be recognized as a valid subspecies, while  
470 other lineages have conflicting subspecific designations (Arribas, 2009; Schmidtler  
471 and Böhme, 2011). While diagnostic morphological features are scarce (Guillaume et  
472 al., 2006), in-depth analyses using more levels of the phenotype (e.g. differences in  
473 colouration, behavior, reproduction and ecology) should resolve whether the  
474 distinguished genetic lineages are supported by phenotypic data. A taxonomic  
475 revision for these lineages combined with morphological and ecological data across  
476 the whole distribution of the group is much-needed.

477

#### 478 *4.3 Advantages and challenges of RADSeq data for phylogenetic reconstruction*

479         Our phylogenetic reconstruction represents the most comprehensive and  
480 robust phylogeny of common lizards to date, based on 194,358 bp of polymorphic  
481 SNPs and 67 individuals. Previous phylogenetic studies on common lizards using

482 only mitochondrial data (Surget-Groba et al., 2006) or fewer nuclear markers  
483 (Cornetti et al., 2014) had only moderate congruency between different markers and  
484 weak support at basal nodes. In agreement with the challenges from previous studies,  
485 our mtDNA phylogeny of an established, informative locus was not compatible with  
486 the phylogenomic dataset, highlighting the limitations of mtDNA (Ballard and  
487 Whitlock, 2004; Wallis et al., 2017; Willis et al., 2014) and suggesting it is not an  
488 appropriate marker for resolving the history of common lizards. More generally, we  
489 suggest that for groups with short internal branches and evolutionary histories of  
490 recent to several million years divergence, the type of data produced by RADSeq  
491 might be optimal to resolve difficult evolutionary splits. This is the case for adaptive  
492 radiations or more generally for short and quick speciation events and complex  
493 phylogeographic histories (Giarla and Esselstyn, 2015; Rodríguez et al., 2017). This  
494 study evidences the power of fast evolving loci (loci with several SNPs) to resolve  
495 short phylogenetic branches.

496 A challenge of short-read phylogenomics and loci with multiple SNPs is the  
497 validity of orthology between loci. We show that topological groupings are more  
498 robustly supported when using loci with multiple SNPs (Fig S1) and we present an  
499 assessment pipeline for validating the cut-offs for missing data and SNPs per locus.  
500 Without a reference genome and a large amount of duplicated and/or repetitive DNA,  
501 orthology of RAD loci is usually not evaluated. Using a reference genome to map the  
502 RAD loci and high sequencing coverage per individual, such as done here, are  
503 important methodological considerations to overcome these issues (Mastretta-Yanes  
504 et al., 2015; Shafer et al., 2017). Disadvantages of these large but informative datasets  
505 are long computational time for some analyses, in particular phylogenetic  
506 reconstructions using Bayesian coalescence based analyses (Bryant et al., 2012).  
507 Advances in phylogenomic methodologies to accommodate these more complex  
508 datasets will be important for advancing the field (Delsuc et al., 2005; Fuentes-Pardo  
509 and Ruzzante, 2017; Leavitt et al., 2016).

510

#### 511 *4.4 Conclusions*

512 Our results strongly support a single origin of viviparity in common lizards  
513 and a subsequent reversal to oviparity in one derived lineage as the most

514 parsimonious scenario of reproductive mode evolution (Fig 3, Table 1). In the light of  
515 karyological and reproductive data (Arrayago et al., 1996; Heulin et al., 2002; Lindtke  
516 et al., 2010; Odierna et al., 2004, 1998), these findings are strong evidence that a  
517 reversal to oviparity has occurred what is now the allopatric western oviparous  
518 lineage (Fig. 2, Fig. 3). In addition, we propose that a taxonomic revision of this  
519 genus at the subspecific level may be needed. More generally, this suggests that  
520 Dollo's law of irreversibility is not without exceptions, and might be particularly  
521 prone to switches between characters at early stages of evolution of a new or lost trait.  
522 For the future, we suggest that common lizards represent an ideal candidate to  
523 investigate the genomic basis for evolutionary complex reversals.  
524

525 **Acknowledgments**

526 This work would not have been possible without the support and contribution of  
527 samples by Werner Mayer, to whom we are very grateful. We thank B. Murphy and  
528 A. Lathrop at the Royal Ontario Museum for providing tissue samples. We  
529 particularly thank Austrian and Scottish authorities for issuing collection permits  
530 (HE3-NS-959/2013; SNH license number 64972). We thank Megan Layton, Henrique  
531 Leitão, Mark Sutherland, Ruth Carey, Michael Andrews, Jade McClelland, and  
532 Nathalie Feiner for assistance and companionship in the field during the collection of  
533 crucial samples. We thank Aileen Adams, Arne Jacobs, Julie Galbraith, Jing Wang,  
534 Lorraine Glennie, and Peter Jeffrey Koene for their help in the lab and A. Yurchenko  
535 for access to the reference genome and valuable discussions. For funding we  
536 gratefully acknowledge a Heredity Fieldwork grant by the Genetic Society to HR, a  
537 University of Glasgow Lord Kelvin-Adam Smith PhD Studentship to KRE and NK  
538 for HR, and NERC grant NE/N003942/1 to KRE.  
539

540 **Author Contributions**

541 KRE, NK and HR conceived the study. HR and KRE collected samples and designed  
542 the experiments. HR generated data, performed all analyses and drafted the  
543 manuscript. KRE, NK and HR all contributed to the writing of the final version of  
544 manuscript.

545 **Conflicts of Interest**

546 The authors declare no conflict of interest.

547 **References**

- 548 Alexander, D.H., Novembre, J., Lange, K., 2009. Fast model-based estimation of  
549 ancestry in unrelated individuals. *Genome Res.* 19, 1655–64.  
550 doi:10.1101/gr.094052.109
- 551 Arrayago, A.M., Bea, A., Heulin, B., Arrayago, M., Heulin, B., Aranzadi, S.D.C.,  
552 Zuolaga, P.I., Sebastian, D., 1996. Hybridization experiment between oviparous  
553 and viviparous strains of *Lacerta vivipara*: A new insight into the evolution of  
554 viviparity in reptiles. *Herpetologica* 52, 333–342. doi:10.2307/3892653
- 555 Arribas, O.J., 2009. Morphological variability of the Cantabro-Pyrenean populations  
556 of *Zootoca vivipara* with description of a new subspecies. *Herpetozoa* 21, 123–  
557 146.
- 558 Ballard, J.W.O., Whitlock, M.C., 2004. The incomplete natural history of  
559 mitochondria. *Mol. Ecol.* 13, 729–744. doi:10.1046/j.1365-294X.2003.02063.x
- 560 Blackburn, D., 1999. Are viviparity and egg-guarding evolutionarily labile in  
561 squamates? *Herpetologica* 55, 556–573.
- 562 Blackburn, D.G., 2015. Evolution of viviparity in squamate reptiles: Reversibility  
563 reconsidered. *J. Exp. Zool. Part B Mol. Dev. Evol.* 324, 473–486.  
564 doi:10.1002/jez.b.22625
- 565 Blackburn, D.G., 2006. Squamate reptiles as model organisms for the evolution of  
566 viviparity. *Herpetol. Monogr.* 20, 131. doi:10.1655/0733-  
567 1347(2007)20[131:SRAMOF]2.0.CO;2
- 568 Bouckaert, R., Heled, J., Kühnert, D., Vaughan, T., Wu, C.H., Xie, D., Suchard,  
569 M.A., Rambaut, A., Drummond, A.J., 2014. BEAST 2: A Software platform for  
570 Bayesian evolutionary analysis. *PLoS Comput. Biol.* 10.  
571 doi:10.1371/journal.pcbi.1003537
- 572 Bryant, D., Bouckaert, R., Felsenstein, J., Rosenberg, N.A., Roychoudhury, A., 2012.  
573 Inferring species trees directly from biallelic genetic markers: Bypassing gene  
574 trees in a full coalescent analysis. *Mol. Biol. Evol.* 29, 1917–1932.  
575 doi:10.1093/molbev/mss086
- 576 Catchen, J.M., Amores, A., Hohenlohe, P., Cresko, W., Postlethwait, J.H., 2011.  
577 Stacks: Building and genotyping loci de novo from short-read sequences. *G3*  
578 *Genes Genom. Genet.* 1, 171–182. doi:10.1534/g3.111.000240

- 579 Collin, R., Cipriani, R., 2003. Dollo's law and the re-evolution of shell coiling.  
580 Proceedings. Biol. Sci. 270, 2551–5. doi:10.1098/rspb.2003.2517
- 581 Collin, R., Miglietta, M.P., 2008. Reversing opinions on Dollo's Law. Trends Ecol.  
582 Evol. 23, 602–609. doi:10.1016/j.tree.2008.06.013
- 583 Cornetti, L., Belluardo, F., Ghielmi, S., Giovine, G., Ficetola, G.F., Bertorelle, G.,  
584 Vernesi, C., Hauffe, H.C., 2015a. Reproductive isolation between oviparous and  
585 viviparous lineages of the Eurasian common lizard *Zootoca vivipara* in a contact  
586 zone. Biol. J. Linn. Soc. 114, 566–573. doi:10.1111/bij.12478
- 587 Cornetti, L., Ficetola, G.F., Hoban, S., Vernesi, C., 2015b. Genetic and ecological  
588 data reveal species boundaries between viviparous and oviparous lizard lineages.  
589 Heredity (Edinb). 115, 517–526. doi:10.1038/hdy.2015.54
- 590 Cornetti, L., Menegon, M., Giovine, G., Heulin, B., Vernesi, C., 2014. Mitochondrial  
591 and nuclear DNA survey of *Zootoca vivipara* across the eastern Italian Alps:  
592 Evolutionary relationships, historical demography and conservation implications.  
593 PLoS One 9. doi:10.1371/journal.pone.0085912
- 594 Darriba, D., Taboada, G.L., Doallo, R., Posada, D., 2012. jModelTest2: more models,  
595 new heuristics and parallel computing. Nat. Methods 9, 772.  
596 doi:10.1038/nmeth.2109
- 597 Delsuc, F., Brinkmann, H., Philippe, H., 2005. Phylogenomics and the reconstruction  
598 of the tree of life. Nat. Rev. Genet. 6, 361–375. doi:10.1038/nrg1603
- 599 Dollo, L., 1893. The laws of evolution. Bull. la Société belge géologie, paléontologie  
600 d'hydrologie. 7, 164–166.
- 601 Eaton, D.A.R., Spriggs, E.L., Park, B., Donoghue, M.J., 2017. Misconceptions on  
602 missing data in RAD-seq phylogenetics with a deep-scale example from  
603 flowering plants. Syst. Biol. 66, 399–412. doi:10.1093/sysbio/syw092
- 604 Fairbairn, J., Shine, R., Moritz, C., Frommer, M., 1998. Phylogenetic relationships  
605 between oviparous and viviparous populations of an Australian lizard (*Lerista*  
606 *bougainvillii*, Scincidae). Mol. Phylogenet. Evol. 10, 95–103.  
607 doi:10.1006/mpev.1997.0468
- 608 Freire, N.P., Tennant, M.R., Miyamoto, M.M., 2003. Microarray analyses of reptiles  
609 and amphibians: application in ecology and evolution. Zool. Stud. 42, 391–404.
- 610 Fuentes-Pardo, A.P., Ruzzante, D.E., 2017. Whole-genome sequencing approaches



- 611 for conservation biology: Advantages, limitations and practical  
612 recommendations. *Mol. Ecol.* 26, 5369–5406. doi:10.1111/mec.14264
- 613 Giarla, T.C., Esselstyn, J.A., 2015. The Challenges of Resolving a Rapid, Recent  
614 Radiation: Empirical and Simulated Phylogenomics of Philippine Shrews. *Syst.*  
615 *Biol.* 64, 727–740. doi:10.1093/sysbio/syv029
- 616 Griffith, O.W., Blackburn, D.G., Brandley, M.C., Van Dyke, J.U., Whittington, C.M.,  
617 Thompson, M.B., 2015. Ancestral state reconstructions require biological  
618 evidence to test evolutionary hypotheses: A case study examining the evolution  
619 of reproductive mode in squamate reptiles. *J. Exp. Zool. Part B Mol. Dev. Evol.*  
620 324, 493–503. doi:10.1002/jez.b.22614
- 621 Guillaume, C.P., Heulin, B., Pavlinov, I.Y., Semenov, D. V, Bea, A., Vogrin, N.,  
622 Surget-Groba, Y., 2006. Morphological variations in the common lizard, *Lacerta*  
623 (*Zootoca*) *vivipara*. *Russ. J. Herpetol.* 13, 1–10.
- 624 Hahn, M.W., Nakhleh, L., 2016. Irrational exuberance for resolved species trees.  
625 *Evolution* 70, 7–17. doi:10.1111/evo.12832
- 626 Heulin, B., Ghielmi, S., Vogrin, N., Surget-Groba, Y., Guillaume, C.P., 2002.  
627 Variation in eggshell characteristics and in intrauterine egg retention between  
628 two oviparous clades of the lizard *Lacerta vivipara*: Insight into the oviparity-  
629 viviparity continuum in squamates. *J. Morphol.* 252, 255–262.  
630 doi:10.1002/jmor.1103
- 631 Huang, H., Lacey Knowles, L., 2016. Unforeseen consequences of excluding missing  
632 data from next-generation sequences: Simulation study of rad sequences. *Syst.*  
633 *Biol.* 65, 357–365. doi:10.1093/sysbio/syu046
- 634 Jiang, W., Chen, S.Y., Wang, H., Li, D.Z., Wiens, J.J., 2014. Should genes with  
635 missing data be excluded from phylogenetic analyses? *Mol. Phylogenet. Evol.*  
636 80, 308–318. doi:10.1016/j.ympev.2014.08.006
- 637 Kearse, M., Moir, R., Wilson, A., Stones-Havas, S., Cheung, M., Sturrock, S.,  
638 Buxton, S., Cooper, A., Markowitz, S., Duran, C., Thierer, T., Ashton, B.,  
639 Meintjes, P., Drummond, A., 2012. Geneious Basic: An integrated and  
640 extendable desktop software platform for the organization and analysis of  
641 sequence data. *Bioinformatics* 28, 1647–1649.  
642 doi:10.1093/bioinformatics/bts199

- 643 Keenan, K., McGinnity, P., Cross, T.F., Crozier, W.W., Prodöhl, P.A., 2013.  
644 diveRsity : An R package for the estimation and exploration of population  
645 genetics parameters and their associated errors. *Methods Ecol. Evol.* 4, 782–788.  
646 doi:10.1111/2041-210X.12067
- 647 King, B., Lee, M.S.Y., 2015. Ancestral state reconstruction, rate heterogeneity, and  
648 the evolution of reptile viviparity. *Syst. Biol.* 64, 532–544.  
649 doi:10.1093/sysbio/syv005
- 650 Kupriyanova, L.A., Mayer, W., Böhme, W., 2006. Karyotype diversity of the  
651 Eurasian lizard *Zootoca vivipara* ( Jacquin , 1787 ) from Central Europe and the  
652 evolution of viviparity, *Herpetologia Bonnensis II. Proceedings of the 13th*  
653 *Congress of the Societas Europaea Herpetologica. Bonn.*
- 654 Kupriyanova, L., Kuksin, A., Odierna, G., 2008. Karyotype, chromosome structure,  
655 reproductive modalities of three Southern Eurasian populations of the common  
656 lacertid lizard, *Zootoca vivipara* (Jacquin, 1787). *Acta Herpetol.* 3, 99–106.
- 657 Le Galliard, J.F., Le Bris, M., Clobert, J., 2003. Timing of locomotor impairment and  
658 shift in thermal preferences during gravidity in a viviparous lizard. *Funct. Ecol.*  
659 17, 877–885. doi:10.1046/j.0269-8463.2003.00800.x
- 660 Leavitt, D.H., Marion, A.B., Hollingsworth, B.D., Reeder, T.W., 2017. Multilocus  
661 phylogeny of alligator lizards (Elgaria, Anguillidae): Testing mtDNA introgression  
662 as the source of discordant molecular phylogenetic hypotheses. *Mol. Phylogenet.*  
663 *Evol.* 110, 104–121. doi:10.1016/J.YMPEV.2017.02.010
- 664 Leavitt, S.D., Grewe, F., Widhalm, T., Muggia, L., Wray, B., Lumbsch, H.T., 2016.  
665 Resolving evolutionary relationships in lichen-forming fungi using diverse  
666 phylogenomic datasets and analytical approaches. *Sci. Rep.* 6, 22262.  
667 doi:10.1038/srep22262
- 668 Lee, M.S.Y., Shine, R., 1998. Reptilian viviparity and Dollo' s law. *Evolution* 52,  
669 1441–1450.
- 670 Li, H., Durbin, R., 2010. Fast and accurate long-read alignment with Burrows–  
671 Wheeler transform. *Bioinformatics* 26, 589–595.  
672 doi:10.1093/bioinformatics/btp698
- 673 Li, H., Handsaker, B., Wysoker, A., Fennell, T., Ruan, J., Homer, N., Marth, G.,  
674 Abecasis, G., Durbin, R., 2009. The Sequence Alignment/Map format and

- 675 SAMtools. *Bioinformatics* 25, 2078–2079. doi:10.1093/bioinformatics/btp352
- 676 Lindtke, D., Mayer, W., Böhme, W., 2010. Identification of a contact zone between  
677 oviparous and viviparous common lizards (*Zootoca vivipara*) in central Europe:  
678 Reproductive strategies and natural hybridization. *Salamandra* 46, 73–82.
- 679 Lynch, V.J., Wagner, G.P., 2010. Did egg-laying boas break Dollo’s law?  
680 Phylogenetic evidence for reversal to oviparity in sand boas (Eryx: Boidae).  
681 *Evolution* 64, 207–216. doi:10.1111/j.1558-5646.2009.00790.x
- 682 Mastretta-Yanes, A., Arrigo, N., Alvarez, N., Jorgensen, T.H., Piñero, D., Emerson,  
683 B.C., 2015. Restriction site-associated DNA sequencing, genotyping error  
684 estimation and *de novo* assembly optimization for population genetic inference.  
685 *Mol. Ecol. Resour.* 15, 28–41. doi:10.1111/1755-0998.12291
- 686 Mayer, W., Böhme, W., Tiedemann, F., Bischoff, W., 2000. On oviparous  
687 populations of *Zootoca vivipara* (Jacquin, 1787) in south-eastern Central Europe  
688 and their phylogenetic relationship to neighbouring viviparous and South-west  
689 European oviparous populations. *Herpetozoa* 13, 59–69.
- 690 Miller, M.A., Pfeiffer, W., Schwartz, T., 2010. Creating the CIPRES Science  
691 Gateway for inference of large phylogenetic trees, in: 2010 Gateway Computing  
692 Environments Workshop, GCE 2010. doi:10.1109/GCE.2010.5676129
- 693 Murphy, B.F., Thompson, M.B., 2011. A review of the evolution of viviparity in  
694 squamate reptiles: The past, present and future role of molecular biology and  
695 genomics. *J. Comp. Physiol. B Biochem. Syst. Environ. Physiol.* 181, 575–594.  
696 doi:10.1007/s00360-011-0584-0
- 697 Near, T.J., Keck, B.P., 2013. Free from mitochondrial DNA: Nuclear genes and the  
698 inference of species trees among closely related darter lineages (Teleostei:  
699 Percidae: Etheostomatinae). *Mol. Phylogenet. Evol.* 66, 868–876.  
700 doi:10.1016/J.YMPEV.2012.11.009
- 701 Odierna, G., Aprea, G., Capriglione, T., Arribas, O.J., Kupriyanova, L.A., Olmo, E.,  
702 1998. Progressive differentiation of the W sex-chromosome between oviparous  
703 and viviparous populations of *Zootoca vivipara* (Reptilia, Lacertidae). *Ital. J.*  
704 *Zool.* 65, 295–302. doi:10.1080/11250008809386761
- 705 Odierna, G., Aprea, G., Capriglione, T., Puky, M., 2004. Chromosomal evidence for  
706 the double origin of viviparity in the European common lizard, *Lacerta*

- 707           (*Zootoca*) *vivipara*. Herpetol. J. 14, 157–160.
- 708 Peterson, B.K. et al, Weber, J.N., Kay, E.H., Fisher, H.S., Hoekstra, H.E., 2012.
- 709           Double digest RADseq: an inexpensive method for *de novo* SNP discovery and
- 710           genotyping in model and non-model species. PLoS One 7, 1–11.
- 711           doi:10.1371/journal.pone.0037135
- 712 Pickrell, J.K., Pritchard, J.K., 2012. Inference of population splits and mixtures from
- 713           genome-wide allele frequency data. PLoS Genet. 8.
- 714           doi:10.1371/journal.pgen.1002967
- 715 Posada, D., 2016. Phylogenomics for Systematic Biology. Syst. Biol. 65, 353–356.
- 716           doi:10.1093/sysbio/syw027
- 717 Pyron, R.A., Burbrink, F.T., 2014. Early origin of viviparity and multiple reversions
- 718           to oviparity in squamate reptiles. Ecol. Lett. 17, 13–21. doi:10.1111/ele.12168
- 719 Rambaut, A., Drummond, A.J., 2009. Tracer V1.5. Available from
- 720           <http://beast.bio.ed.ac.uk/Tracer>.
- 721 Recknagel, H., Elmer, K.R., Meyer, A., 2013. A hybrid genetic linkage map of two
- 722           ecologically and morphologically divergent Midas Cichlid fishes (*Amphilophus*
- 723           spp.) obtained by massively parallel DNA sequencing (ddRADSeq). G3 Genes
- 724           Genom. Genet. 3, 65–74. doi:10.1534/g3.112.003897
- 725 Recknagel, H., Jacobs, A., Herzyk, P., Elmer, K.R., 2015. Double-digest RAD
- 726           sequencing using Ion Proton semiconductor platform (ddRADseq-ion) with
- 727           nonmodel organisms. Mol. Ecol. Resour. 15, 1316–1329. doi:10.1111/1755-
- 728           0998.12406
- 729 Rodríguez-Prieto, A., Giovine, G., Laddaga, L., Ghielmi, S., Cornetti, L., 2017. Very
- 730           similar, but not identical: morphological taxonomic identification to improve the
- 731           resolution of fine-scale distribution of *Zootoca (vivipara) carniolica*. Amphibia-
- 732           Reptilia. doi:10.1163/15685381-00003120
- 733 Rodríguez, A., Burgon, J.D., Lyra, M., Irisarri, I., Baurain, D., Blaustein, L., Göçmen,
- 734           B., Künzel, S., Mable, B.K., Nolte, A.W., Veith, M., Steinfartz, S., Elmer, K.R.,
- 735           Philippe, H., Vences, M., 2017. Inferring the shallow phylogeny of true
- 736           salamanders (*Salamandra*) by multiple phylogenomic approaches. Mol.
- 737           Phylogenet. Evol. 115, 16–26. doi:10.1016/j.ympev.2017.07.009
- 738 Rowe, H.C., Renaut, S., Guggisberg, A., 2011. RAD in the realm of next-generation

- 739 sequencing technologies. *Mol. Ecol.* 20, 3499–3502. doi:10.1111/j.1365-  
740 294X.2011.05197.x
- 741 Schmidtler, J.F., Böhme, W., 2011. Synonymy and nomenclatural history of the  
742 Common or Viviparous Lizard, by this time: *Zootoca vivipara* (Lichtenstein,  
743 1823). *Bonn Zool. Bull.* 60, 214–228.
- 744 Shafer, A.B.A., Peart, C.R., Tusso, S., Maayan, I., Brelsford, A., Wheat, C.W., Wolf,  
745 J.B.W., 2017. Bioinformatic processing of RAD-seq data dramatically impacts  
746 downstream population genetic inference. *Methods Ecol. Evol.* 8, 907–917.  
747 doi:10.1111/2041-210X.12700
- 748 Shimodaira, H., 2002. An approximately unbiased test of phylogenetic tree selection.  
749 *Syst. Biol.* 51, 492–508. doi:10.1080/10635150290069913
- 750 Shimodaira, H., Hasegawa, M., 2001. CONSEL: for assessing the confidence of  
751 phylogenetic tree selection. *Bioinformatics* 17, 1246–1247.  
752 doi:10.1093/bioinformatics/17.12.1246
- 753 Shimodaira, H., Hasegawa, M., 1999. Multiple comparisons of log-likelihoods with  
754 applications to phylogenetic inference. *Mol. Biol. Evol.* 16, 1114–1116.  
755 doi:10.1093/oxfordjournals.molbev.a026201
- 756 Shine, R., Lee, M.S.Y., 1999. A reanalysis of the evolution of viviparity and egg-  
757 guarding in squamate reptiles. *Herpetologica* 55, 538–549.
- 758 Sites, J.W., Reeder, T.W., Wiens, J.J., 2011. Phylogenetic insights on evolutionary  
759 novelties in lizards and snakes: sex, birth, bodies, niches, and venom. *Annu. Rev.*  
760 *Ecol. Evol. Syst.* 42, 227–244. doi:10.1146/annurev-ecolsys-102710-145051
- 761 Smith, M.F., Patton, J.L., 1991. Variation in mitochondrial cytochrome b sequence in  
762 natural populations of South American akodontine rodents (Muridae:  
763 Sigmodontinae). *Mol. Biol. Evol.* 8, 85–103.  
764 doi:10.1093/oxfordjournals.molbev.a040638
- 765 Stamatakis, A., 2006. RAxML 7.0.4 Manual. *Bioinformatics* 22(21), 2688–2690.  
766 doi:10.1093/bioinformatics/btl446
- 767 Streicher, J.W., Schulte, J.A., Wiens, J.J., 2016. How should genes and taxa be  
768 sampled for phylogenomic analyses with missing data? An empirical study in  
769 Iguanian lizards. *Syst. Biol.* 65, 128–145. doi:10.1093/sysbio/syv058
- 770 Surget-Groba, Y., Heulin, B., Guillaume, C.-P., Thorpe, R.S., Kupriyanova, L.,

- 771 Vogrin, N., Maslak, R., Mazzotti, S., Venczel, M., Ghira, I., Odierna, G.,  
772 Leontyeva, O., Monney, J.C., Smith, N., 2001. Intraspecific phylogeography of  
773 *Lacerta vivipara* and the evolution of viviparity. *Mol. Phylogenet. Evol.* 18,  
774 449–459. doi:10.1006/mpev.2000.0896
- 775 Surget-Groba, Y., Heulin, B., Guillaume, C.P., Puky, M., Semenov, D., Orlova, V.,  
776 Kupriyanova, L., Ghira, I., Smajda, B., 2006. Multiple origins of viviparity, or  
777 reversal from viviparity to oviparity? The European common lizard (*Zootoca*  
778 *vivipara*, Lacertidae) and the evolution of parity. *Biol. J. Linn. Soc.* 87, 1–11.  
779 doi:10.1111/j.1095-8312.2006.00552.x
- 780 Swofford, D.L., 2002. Phylogenetic analysis using parsimony. *Options* 42, 294–307.  
781 doi:10.1007/BF02198856
- 782 Velekei, B., Lakatos, F., Covaciu-Marcov, S.D., Sas-Kovács, I., Puky, M., 2015. New  
783 *Zootoca vivipara* (Lichtenstein, 1823) haplogroup in the Carpathians. *North.*  
784 *West. J. Zool.*
- 785 Wallis, G.P., Cameron-Christie, S.R., Kennedy, H.L., Palmer, G., Sanders, T.R.,  
786 Winter, D.J., 2017. Interspecific hybridization causes long-term phylogenetic  
787 discordance between nuclear and mitochondrial genomes in freshwater fishes.  
788 *Mol. Ecol.* 26, 3116–3127. doi:10.1111/mec.14096
- 789 Whiting, M.F., Bradler, S., Maxwell, T., 2003. Loss and recovery of wings in stick  
790 insects. *Nature* 421, 264–267. doi:10.1038/nature01274.1.
- 791 Wiens, J.J., 2011. Re-evolution of lost mandibular teeth in frogs after more than 200  
792 million years, and re-evaluating dollo's law. *Evolution* 65, 1283–1296.  
793 doi:10.1111/j.1558-5646.2011.01221.x
- 794 Willis, S.C., Farias, I.P., Ortí, G., 2014. Testing mitochondrial capture and deep  
795 coalescence in Amazonian cichlid fishes (Cichlidae: *Cichla*). *Evolution* 68, 256–  
796 268. doi:10.1111/evo.12230
- 797 Wright, A.M., Lyons, K.M., Brandley, M.C., Hillis, D.M., 2015. Which came first:  
798 The lizard or the egg? Robustness in phylogenetic reconstruction of ancestral  
799 states. *J. Exp. Zool. Part B Mol. Dev. Evol.* 324, 504–516.  
800 doi:10.1002/jez.b.22642  
801

802 **Table 1.** Statistics of alternative topological constraints. Five alternative topological constraints were set and compared to the best  
803 performing maximum likelihood tree. Topological constraints were set to represent different evolutionary hypotheses of parity mode  
804 evolution (assuming the most parsimonious path of evolution, i.e. the lowest number of possible transitions). Constraint models are  
805 ranked by observations, starting with the model without constraint. Constraint models are the following: i) ‘no constraint’ is consistent  
806 with a reversal to oviparity and refers to the topology in Figure 3, ii) ‘viviparous CVII basal’ is the same topology as i), only specifying  
807 the constraint that the central viviparous II lineage is sister to all remaining lineages excluding the eastern oviparous lineage, which is  
808 basal to central viviparous II; it is consistent with a reversal to oviparity and Figure 3, iii) ‘multiple viviparity’ constrains central  
809 viviparous II as sister to eastern oviparous, and western oviparous sister to all other viviparous lineages, consistent with two independent  
810 origins of viviparity and Figure 1B, iv) ‘oviparity basal’ constrains eastern and western oviparous lineages to be basal to all other  
811 viviparous lineages and is consistent with a single origin of viviparity and Figure 1A, v) ‘viviparous CVII not basal’ constrains the  
812 eastern oviparous lineage to be basal to all other lineages, but the central viviparous II not as basal to the remaining lineages; it is  
813 consistent with a reversal to oviparity but not with sex chromosome evolution and corresponds to Figure 1C, and vi) ‘viviparous RO  
814 basal’ constrains the Carpathian lineage to be sister to the eastern oviparous lineage, consistent with multiple independent origins of  
815 viviparity and potentially a reversal to oviparity and corresponds to Figure 1D.

| <b>constraint</b>         | <b>rank</b> | <b>obs</b> | <b>AU</b> | <b>NP</b> | <b>BP</b> | <b>PP</b> | <b>KH</b> | <b>SH</b> | <b>wtd-KH</b> | <b>wtd-SH</b> |
|---------------------------|-------------|------------|-----------|-----------|-----------|-----------|-----------|-----------|---------------|---------------|
| no constraint             | 1           | 0          | 0.518     | 0.493     | 0.502     | 0.500     | 0.496     | 0.918     | 0.496         | 0.918         |
| viviparous CVII basal     | 2           | 0          | 0.535     | 0.501     | 0.494     | 0.500     | 0.504     | 0.891     | 0.504         | 0.891         |
| multiple viviparity       | 3           | 404.6      | 0.000     | 0.000     | 0.000     | 0.000     | 0.000     | 0.021     | 0.000         | 0.000         |
| oviparity basal           | 4           | 452.7      | 0.005     | 0.004     | 0.004     | 0.000     | 0.004     | 0.004     | 0.004         | 0.011         |
| viviparous CVII not basal | 5           | 1206.9     | 0.000     | 0.000     | 0.000     | 0.000     | 0.000     | 0.000     | 0.000         | 0.000         |
| viviparous ROM basal      | 6           | 2478       | 0.000     | 0.000     | 0.000     | 0.000     | 0.000     | 0.000     | 0.000         | 0.000         |

816 Abbreviations are: obs = observations, AU = Approximately unbiased test, NP = non-scaled bootstrap probability, BP = bootstrap  
817 probability, PP = Bayesian posterior probability, KH = Kishino-Hasegawa test, SH = Shimodaira-Hasegawa test, wtd = weighted, CVII =  
818 central viviparous II, CVI = central viviparous I, RO = Carpathian viviparous clade.



819 **Captions to Figures:**

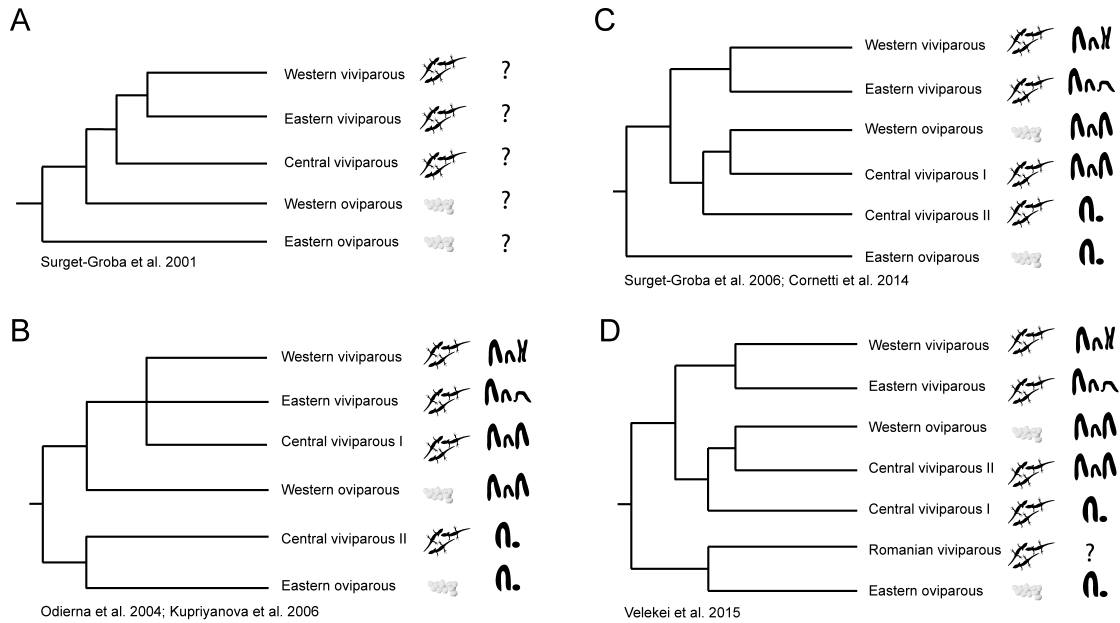

820

821

822 **Figure 1.** Alternative hypotheses for phylogenetic relationships of common lizards

823 and parity mode evolution. Parity mode and sex chromosome configuration (ZW or

824  $Z_1Z_2W$ ; Odierna et al., 2004) are illustrated next to each respective lineage.

825 Phylogenetic tree A) involves a single origin of viviparity and was supported by one

826 mtDNA gene. The second tree B) is based on karyological studies and suggests two

827 independent origins of viviparity. Hypothesis C) suggests a reversal to oviparity as

828 most parsimonious scenario, based on mtDNA and a few nuclear genes. The last

829 phylogeny D) includes a recently discovered viviparous lineage in the Carpathians,

830 which was found to be closely related to the most basal oviparous lineage. Parity

831 mode evolution in this scenario involves two independent origins of viviparity and a

832 reversal to oviparity.

833

834

835

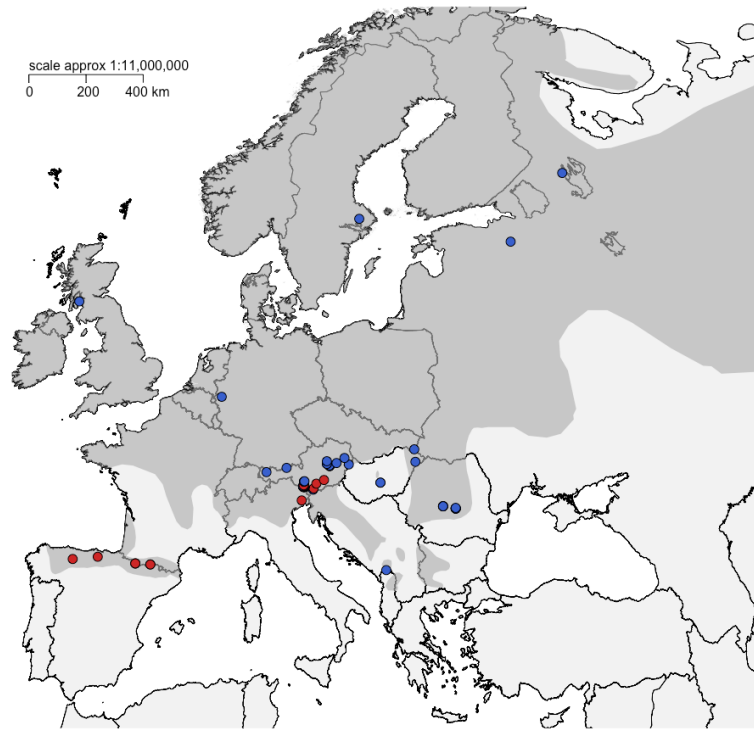

836

837 **Figure 2.** Map of common lizard (*Zootoca vivipara*) sampling locations within  
838 Europe. The dark grey shaded area marks the distribution of the common lizard in  
839 Europe. Each dot represents a single individual (red = oviparous; blue = viviparous)  
840 captured at the respective location. Note that a single individual from central Russia  
841 included in the phylogenetic analyses is outside the scope of the map (see Table S1).

842

843

844

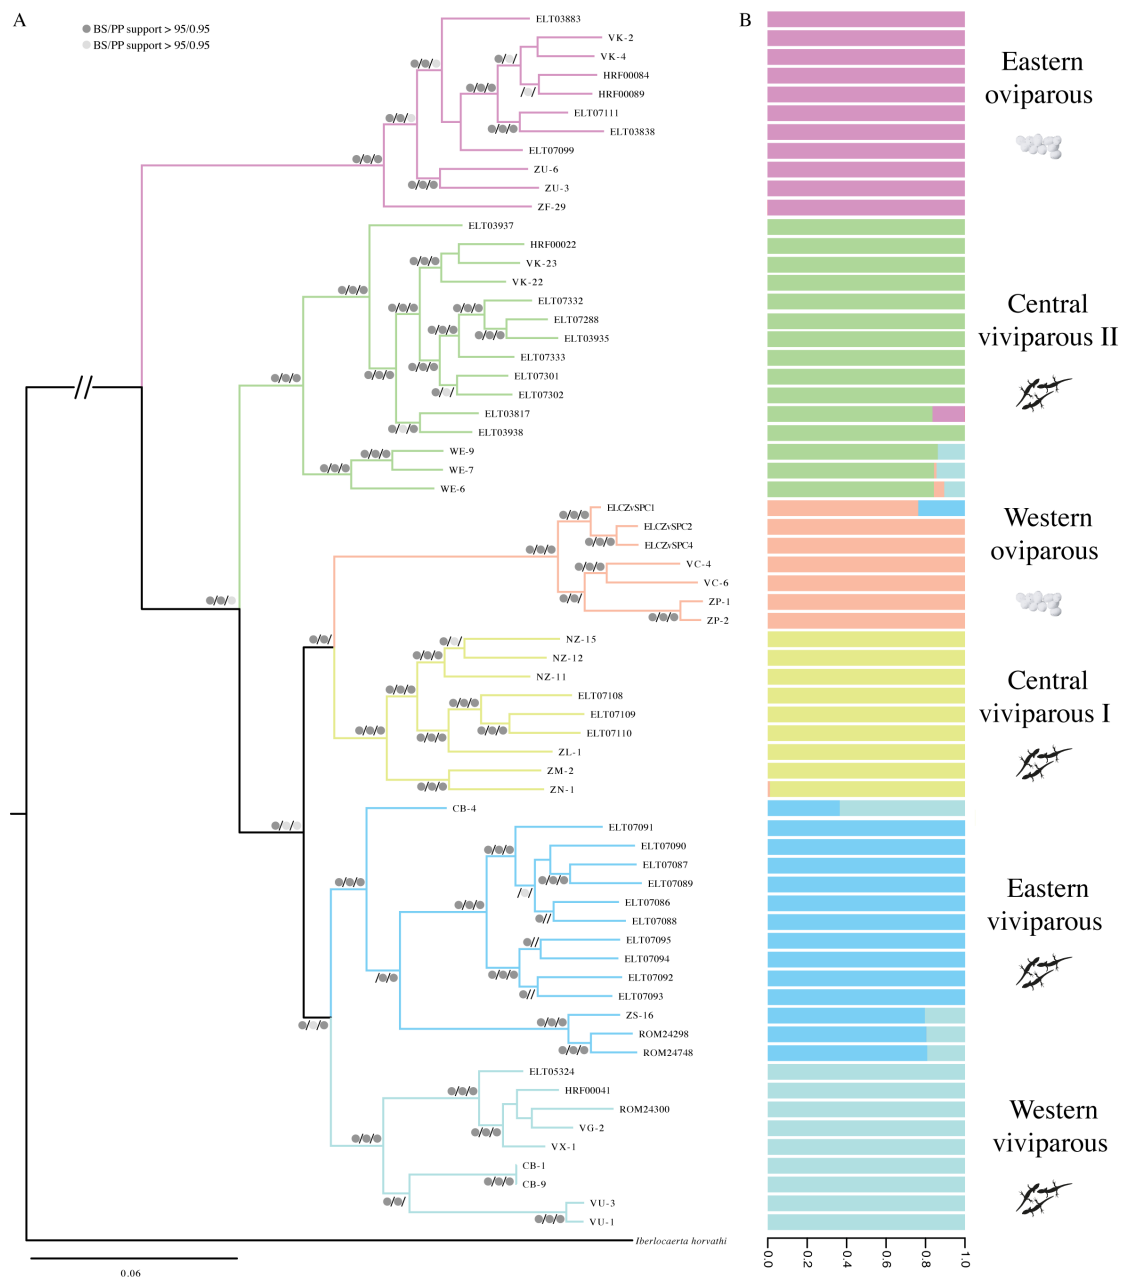

845

846 **Figure 3.** Bayesian (B), Maximum likelihood (ML) and maximum parsimony (MP)  
 847 reconstruction of common lizard evolutionary relationships based on ddRADSeq data.

848 A) The Bayesian tree was used with a full alignment using 1,334,760 sites (84,017

849 SNPs) and ML and MP trees were constructed with 194,358 SNPs. B posterior

850 probabilities (BS), ML and MP bootstrap support are indicated by dark grey and light

851 grey dots in that order (see legend). B) An ADMIXTURE analysis included the

852 194,358 SNPs and a k of 6 genetic clusters. Individuals are aligned vertically and

853 respective membership values for each genetic cluster are illustrated. Parity mode and

854 lineage are indicated on the right. *Iberolacerta horvathi* was used as an outgroup (true  
855 branch length not shown for graphical reasons).
